# Supplementary material for: VISTA in Soft Tissue Sarcomas: A Perspective for Immunotherapy?
Source: MDPI journal article supplement (doi:10.3390/cancers14041006), 2022-02-16
Supplement: s1 [file s1]

**Supplemental Table S1:** Multiple logistic regression model of clinicopathological parameters. TILs: Tumour-infiltrating lymphocytes; UPS: Undifferentiated pleomorphic sarcoma; MPNST: Malignant peripheral nerve sheath tumour.

|                         |                               | OR (95% CI)         | <i>p</i> -value |
|-------------------------|-------------------------------|---------------------|-----------------|
| <b>Age</b>              | increase by 1 year            | 1.027 (1.002–1.054) | 0.037           |
| <b>Sex</b>              | female (vs male)              | 1.944 (0.979–3.864) | 0.058           |
| <b>TILs</b>             | ≥ 6 (vs 0–5)                  | 1.436 (0.701–2.943) | 0.322           |
| <b>CD3</b>              | no expression (vs expression) | 2.275 (0.762–6.792) | 0.141           |
| <b>PD-1</b>             | ≥ 4 (vs 0–3)                  | 1.824 (0.821–4.051) | 0.140           |
| <b>PD-L1</b>            | no expression (vs expression) | 2.065 (0.769–5.545) | 0.150           |
| <b>Size</b>             | ≥ 8 cm (vs < 8 cm)            | 1.433 (0.689–2.977) | 0.335           |
| <b>Metastasis</b>       | M1 (vs M0)                    | 1.985 (0.532–7.403) | 0.307           |
| <b>Grade</b>            | Grade 1/2 (vs Grade 3)        | 0.625 (0.303–1.288) | 0.202           |
| <b>Surgical outcome</b> | R2/not resected (vs R0/1)     | 0.368 (0.127–1.064) | 0.065           |
| <b>Histotpye</b>        | UPS (Reference)               | 0.226               |                 |
|                         | Leiomyosarcoma                | 0.506 (0.109–2.346) | 0.384           |
|                         | Synovial sarcoma              | 0.748 (0.153–3.651) | 0.720           |
|                         | Liposarcoma                   | 1.013 (0.198–5.190) | 0.987           |
|                         | Angiosarcoma                  | 0.233 (0.047–1.160) | 0.075           |
|                         | MPNST                         | 0.269 (0.020–3.597) | 0.321           |
|                         | Constant                      | 0.034               |                 |
